# Supplementary material for: Knockdown of the MAPK p38 pathway increases the susceptibility of Chilo suppressalis larvae to Bacillus thuringiensis Cry1Ca toxin
Source: PubMed Central journal article supplement (PMC5338291; doi:10.1038/srep43964), 2017-03-06
Supplement: srep43964-s1.pdf [file srep43964-s1.pdf]

## SUPPLEMENTARY INFORMATION

### **Knockdown of the MAPK p38 pathway increases the susceptibility of *Chilo suppressalis* larvae to *Bacillus thuringiensis* Cry1Ca toxin**

Lin Qiu<sup>1, 2</sup>, Jinxing Fan<sup>2</sup>, Lang Liu<sup>2</sup>, Boyao Zhang<sup>2</sup>, Xiaoping Wang<sup>2</sup>,  
Chaoliang Lei<sup>2</sup>, Yongjun Lin<sup>1</sup> & Weihua Ma<sup>1, 2\*</sup>

<sup>1</sup>National Key Laboratory of Crop Genetic Improvement and National Centre of Plant Gene Research, Wuhan, China;

<sup>2</sup>Hubei Insect Resources Utilization and Sustainable Pest Management Key Laboratory, College of Plant Science and Technology, Huazhong Agricultural University, Wuhan, China;

\* Corresponding author: Weihua Ma

Email: [weihuama@mail.hzau.edu.cn](mailto:weihuama@mail.hzau.edu.cn)

Tel: +86-27-87287207

Fax: +86-27-87287207

**Table S1**

Specific primers used in the experiments.

| Primer Name                           | Orientation | Primer sequence (5'-3')            |
|---------------------------------------|-------------|------------------------------------|
| <b>5'RACE</b>                         |             |                                    |
| <i>P38</i> -GSP1                      | Antisense   | TGTGTTGAGGGTGAGGTTTGAACCTCCAC      |
| <i>P38</i> -GSP2                      | Antisense   | GACCGCAAGGGGGTTGGCACCTCGGAAGA      |
| <i>JNK</i> -GSP1                      | Antisense   | CTTCGCCACTATGTTGGACGGCTTCAGA       |
| <i>JNK</i> -GSP2                      | Antisense   | TTCCCCATAAATGCCAGTGGTTATTGTCAG     |
| <i>ERK1</i> -GSP1                     | Antisense   | GCCAGTGTCCCTCACTGATTGTTCCGCC       |
| <i>ERK1</i> -GSP2                     | Antisense   | CACCTTCTCGGCGTCCGCTTTGCGTATC       |
| <i>ERK2</i> -GSP1                     | Antisense   | AGTCGCAAATCTTCAAATCGCAGGTGGTG      |
| <i>ERK2</i> -GSP2                     | Antisense   | ACAACCATCCCATAGGCTCCTTCCCCAAT      |
| <b>3'RACE</b>                         |             |                                    |
| <i>P38</i> -GSP1                      | Sense       | GGTGCCAACCCCTTGCGGTCAACTTGC        |
| <i>P38</i> -GSP2                      | Sense       | AGAGCTTCGAGGACATGGACCTGCCCGT       |
| <i>JNK</i> -GSP1                      | Sense       | GGAGTTCCAAGATGTGTACCTGGTGATG       |
| <i>JNK</i> -GSP2                      | Sense       | CTGAAGCCGTCCAACATAGTGGCGAAGAGT     |
| <i>ERK1</i> -GSP1                     | Sense       | ATGGATACGCAAAGCGGACGCCGAGAAGG      |
| <i>ERK1</i> -GSP2                     | Sense       | AAAGAGCGGGCGGAACAATCAGTGAGGAC      |
| <i>ERK2</i> -GSP1                     | Sense       | AGTTGGACGACCTGCCGAAGGAGACTCTT      |
| <i>ERK2</i> -GSP2                     | Sense       | GCTGTCTTCGATGACTTCGCCCCACGGC       |
| <b>Performing the qPCR</b>            |             |                                    |
| <i>EF-1</i> -F                        | Sense       | TGAACCCCATACAGCGAATCC              |
| <i>EF-1</i> -R                        | Antisense   | TCTCCGTGCCAACCAGAAATAGG            |
| <i>P38</i> -F                         | Sense       | TCATTTACGCGGTTTTGAGTGCAA           |
| <i>P38</i> -R                         | Antisense   | TGCAAACCTGTCGATCGCTGAA             |
| <i>JNK</i> -F                         | Sense       | GGCAGCTACGATACTGGCAT               |
| <i>JNK</i> -R                         | Antisense   | ACTCCCGATGTTTCTGCGTT               |
| <i>ERK1</i> -F                        | Sense       | TGCCTGCCTATATTTCCGGCAACTT          |
| <i>ERK1</i> -R                        | Antisense   | CCGGTGGAAAGGGTGAGGTTC              |
| <i>ERK2</i> -F                        | Sense       | CTGCGTCTGTACGGGAGTGTC              |
| <i>ERK2</i> -R                        | Antisense   | CGAACAGTTATTTGCCACCAGAAGT          |
| <b>Primers for dsRNA Synthesizing</b> |             |                                    |
| ds <i>Csp38</i> -F                    |             | atGAATTCCGAACAGGCACATTAACCTTCGGAA  |
| ds <i>Csp38</i> -R                    |             | atGGTACCTTTCGAAAATTCGTTTCGTCCGAA   |
| ds <i>CsJNK</i> -F                    |             | atGAATTCACAGTGACGTAGAGTG           |
| ds <i>CsJNK</i> -R                    |             | taGAATTCTACGCCGCGCATAACGATACCCTGT  |
| ds <i>CsERK1</i> -F                   |             | atGAATTCTGAAGAAGAATCCTGACGAAAGAG   |
| ds <i>CsERK1</i> -R                   |             | atGGTACCTGGCGAGAAATGAACTAACG       |
| ds <i>CsERK2</i> -F                   |             | atcGAATTCAAGGAGACTCTTAAGAAGTACA    |
| ds <i>CsERK2</i> -R                   |             | tagGAATTCTATGTAATCTCGTTGAGAGAGAACT |

**Table S2**

Protein sequences of MAPKs used to construct phylogenetic tree.

| <b>Code name</b> | <b>Organism</b>                | <b>Accession number</b> |
|------------------|--------------------------------|-------------------------|
| <b>P38</b>       |                                |                         |
| Bmp38            | <i>Bombyx mori</i>             | NP_001036996.1          |
| Dpp38            | <i>Danaus plexippus</i>        | EHJ76051.1              |
| Lvp38            | <i>Litopenaeus vannamei</i>    | AGG82488.1              |
| Dmp38b           | <i>Drosophila melanogaster</i> | NP_477361.1             |
| Nvp38            | <i>Nasonia vitripennis</i>     | NP_001136337.1          |
| Acp38            | <i>Apis cerana cerana</i>      | ADT91683.1              |
| Scp38            | <i>Sarcophaga crassipalpis</i> | BAF75366.1              |
| Aap38            | <i>Aedes aegypti</i>           | XP_001653240.1          |
| Dmp38a           | <i>Drosophila melanogaster</i> | AAC39031.1              |
| Xlp38            | <i>Xenopus laevis</i>          | BAI67112.1              |
| Drp38            | <i>Danio rerio</i>             | BAB11808.1              |
| Rnp38            | <i>Rattus norvegicus</i>       | AAB51285.1              |
| Mmmapk14         | <i>Macaca mulatta</i>          | AFI33384.1              |
| Clp38            | <i>Canis lupus familiaris</i>  | AAC36131.1              |
| Mpmapk14         | <i>Mustela putorius furo</i>   | AES01588.1              |
| <b>JNK</b>       |                                |                         |
| NvsapkJNK        | <i>Nasonia vitripennis</i>     | XP_008212489.1          |
| AaJNK            | <i>Aedes albopictus</i>        | AAO31950.1              |
| CqJNK            | <i>Culex quinquefasciatus</i>  | XP_001842827.1          |
| DmJNK            | <i>Drosophila melanogaster</i> | AAB97094.1              |
| AcJNK            | <i>Aplysia californica</i>     | NP_001191547.1          |
| MjJNK            | <i>Marsupenaeus japonicus</i>  | BAI87826.1              |
| HaJNK            | <i>Helicoverpa armigera</i>    | AEE81067.1              |
| BmJNK            | <i>Bombyx mori</i>             | NP_001103396.1          |
| ApsapkJNK        | <i>Acyrtosiphon pisum</i>      | XP_001945460.2          |
| AesapkJNK        | <i>Acromyrmex echinatio</i>    | EGI62749.1              |
| HssapkJNK        | <i>Harpegnathos saltator</i>   | EFN90159.1              |
| BtsapkJNK        | <i>Bombus terrestris</i>       | XP_003402842.1          |
| AfsapkJNK        | <i>Apis mellifera</i>          | XP_392806.3             |
| <b>ERK</b>       |                                |                         |
| BmERK            | <i>Bombyx mori</i>             | NP_001036921.1          |
| BtERK1/2         | <i>Bemisia tabaci</i>          | AEE81046.1              |
| Ammapk1          | <i>Apis mellifera</i>          | XP_393029.2             |
| PmERK1/2         | <i>Penaeus monodon</i>         | ADT80930.1              |
| Mjmapk           | <i>Marsupenaeus japonicus</i>  | BAH86598.1              |
| Tcmapk1          | <i>Tribolium castaneum</i>     | XP_966833.1             |
| Btmapk1          | <i>Bombus terrestris</i>       | XP_003394197.1          |
| Apmapk1          | <i>Acyrtosiphon pisum</i>      | XP_001952106.1          |

|         |                                 |                |
|---------|---------------------------------|----------------|
| Hsmapk1 | <i>Homo sapiens</i>             | NP_002736.3    |
| Drmapk1 | <i>Danio rerio</i>              | NP_878308.2    |
| Xlmapk1 | <i>Xenopus laevis</i>           | NP_001083548.1 |
| Fcmapk  | <i>Fenneropenaeus chinensis</i> | AHA83424.1     |
| Mmmapk1 | <i>Mus musculus</i>             | NP_001033752.1 |
| DpERK   | <i>Danaus plexippus</i>         | EHJ76872.1     |
| ScERK   | <i>Sarcophaga crassipalpis</i>  | BAF75365.1     |
| RpERK   | <i>Riptortus pedestris</i>      | BAN20448.1     |

**Table S3**

Primer specifications for optimized qRT-PCR amplification of *Chilo suppressalis*.

| Gene name     | Efficiency | R <sup>2</sup> | Slope  |
|---------------|------------|----------------|--------|
| <i>CsEF1</i>  | 99.8%      | 0.992          | -3.326 |
| <i>Csp38</i>  | 100.9%     | 0.994          | -3.300 |
| <i>CsJNK</i>  | 103.9%     | 0.995          | -3.235 |
| <i>CsERK1</i> | 99.9%      | 0.992          | -3.325 |
| <i>CsERK2</i> | 103.5%     | 0.980          | -3.242 |
